# Supplementary material for: Ocean acidification dampens warming and contamination effects on the physiological stress response of a commercially important fish
Source: Copernicus journal article supplement (doi:10.5194/bg-2017-147), 2017-05-02
Supplement: Supplementary file 1 [file Dataset.xlsx]

## Sheet: Fulton K
Temp	pH	Cont	Tank	Fulton
19C	pH8	C	1	1.60342
19C	pH8	C	1	1.66637
19C	pH8	C	2	1.61683
19C	pH8	C	2	1.53014
19C	pH8	C	2	1.63263
19C	pH8	C	3	1.37366
19C	pH8	C	3	1.5345
23C	pH7.5	C	1	1.55291
23C	pH7.5	C	1	2.20619
23C	pH7.5	C	2	1.36518
23C	pH7.5	C	2	2.20619
23C	pH7.5	C	2	1.49034
23C	pH7.5	C	3	1.53973
23C	pH7.5	C	3	1.55132
23C	pH7.5	C	3	1.54626
19C	pH7.5	C	1	1.59839
19C	pH7.5	C	1	1.85637
19C	pH7.5	C	2	1.25313
19C	pH7.5	C	2	1.69942
19C	pH7.5	C	3	1.4885
19C	pH7.5	C	3	1.51581
23C	pH8	C	1	1.51898
23C	pH8	C	1	1.54143
23C	pH8	C	2	1.59867
23C	pH8	C	2	1.64035
23C	pH8	C	3	1.51137
23C	pH8	C	3	1.59411
23C	pH8	C	3	1.61598
23C	pH8	M	1	1.43411
23C	pH8	M	2	1.58869
23C	pH8	M	3	1.13851
23C	pH8	M	3	1.52998
19C	pH8	M	1	1.61344
19C	pH8	M	1	1.58843
19C	pH8	M	1	1.39509
19C	pH8	M	2	1.6394
19C	pH8	M	2	1.48936
19C	pH8	M	3	2.06516
19C	pH8	M	3	1.66531
19C	pH8	M	3	1.39674
23C	pH7.5	M	1	1.43818
23C	pH7.5	M	1	1.43978
23C	pH7.5	M	1	1.50515
23C	pH7.5	M	2	1.61635
23C	pH7.5	M	2	1.43779
23C	pH7.5	M	3	1.31034
23C	pH7.5	M	3	1.47961
19C	pH7.5	M	1	1.55824
19C	pH7.5	M	1	1.38581
19C	pH7.5	M	1	1.43523
19C	pH7.5	M	2	1.36253
19C	pH7.5	M	2	1.40108
19C	pH7.5	M	2	1.34759
19C	pH7.5	M	3	1.50305
19C	pH7.5	M	3	1.76842
19C	pH7.5	M	3	1.46235

## Sheet: HgT quantification
Temp	pH	Cont	Tank	tissue	Merc
19C	pH7.5	C	1	musc	0.055384
19C	pH7.5	C	2	musc	0.052512
19C	pH7.5	C	1	gills	0.055911
19C	pH7.5	C	2	gills	0.068005
19C	pH7.5	C	1	liver	0.053312
19C	pH7.5	C	2	liver	0.071235
19C	pH8	C	1	musc	0.057996
19C	pH8	C	2	musc	0.061349
19C	pH8	C	1	gills	0.060035
19C	pH8	C	2	gills	0.050473
19C	pH8	C	1	liver	0.056903
19C	pH8	C	2	liver	0.053312
19C	pH7.5	M	1	musc	5.20665
19C	pH7.5	M	1	musc	5.02211
19C	pH7.5	M	2	musc	4.07415
19C	pH7.5	M	2	musc	3.81891
19C	pH7.5	M	3	musc	4.43398
19C	pH7.5	M	3	musc	4.878
19C	pH7.5	M	1	gills	7.9723
19C	pH7.5	M	1	gills	8.35187
19C	pH7.5	M	2	gills	10.4573
19C	pH7.5	M	2	gills	5.75073
19C	pH7.5	M	1	liver	6.35221
19C	pH7.5	M	1	liver	6.26795
19C	pH7.5	M	2	liver	13.5568
19C	pH7.5	M	2	liver	13.2023
19C	pH8	M	1	musc	4.24758
19C	pH8	M	1	musc	3.24652
19C	pH8	M	2	musc	4.54269
19C	pH8	M	2	musc	3.41362
19C	pH8	M	3	musc	3.36793
19C	pH8	M	3	musc	3.6311
19C	pH8	M	1	gills	8.05506
19C	pH8	M	1	gills	8.74507
19C	pH8	M	2	gills	5.12688
19C	pH8	M	2	gills	8.16112
19C	pH8	M	3	gills	6.56364
19C	pH8	M	3	gills	5.0616
19C	pH8	M	1	liver	6.58031
19C	pH8	M	1	liver	6.47997
19C	pH8	M	2	liver	8.26734
19C	pH8	M	2	liver	6.90401
19C	pH8	M	3	liver	7.88859
19C	pH8	M	3	liver	7.88047
23C	pH7.5	C	1	musc	0.071365
23C	pH7.5	C	2	musc	0.081827
23C	pH7.5	C	1	gills	0.041468
23C	pH7.5	C	2	gills	0.047408
23C	pH7.5	C	1	liver	0.035793
23C	pH7.5	C	2	liver	0.042771
23C	pH8	C	1	musc	0.063691
23C	pH8	C	2	musc	0.068243
23C	pH8	C	1	gills	0.049997
23C	pH8	C	2	gills	0.048047
23C	pH8	C	1	liver	0.071235
23C	pH8	C	2	liver	0.064039
23C	pH7.5	M	1	musc	4.44039
23C	pH7.5	M	1	musc	4.42883
23C	pH7.5	M	2	musc	4.27692
23C	pH7.5	M	2	musc	4.32172
23C	pH7.5	M	3	musc	4.27435
23C	pH7.5	M	3	musc	4.40117
23C	pH7.5	M	1	gills	2.88312
23C	pH7.5	M	2	gills	4.44139
23C	pH7.5	M	2	gills	2.43082
23C	pH7.5	M	1	liver	4.59117
23C	pH7.5	M	2	liver	4.30673
23C	pH8	M	1	musc	7.39767
23C	pH8	M	1	musc	7.84513
23C	pH8	M	2	musc	4.62972
23C	pH8	M	2	musc	7.94488
23C	pH8	M	3	musc	4.57131
23C	pH8	M	3	musc	7.67549
23C	pH8	M	1	gills	11.6427
23C	pH8	M	1	gills	12.197
23C	pH8	M	2	gills	15.2718
23C	pH8	M	2	gills	8.39834
23C	pH8	M	1	liver	9.27674
23C	pH8	M	2	liver	19.7983
23C	pH8	M	1	liver	9.15369
23C	pH8	M	2	liver	19.2806

## Sheet: Enzymes
Temp	pH	Cont	Tank	MDA	GST	CAT	SOD
19C	pH8	C	1	0.0607463	6.52622	4.15685	8.10329
19C	pH8	C	1	0.0249465	4.33648	4.51199	8.57724
19C	pH8	C	2	0.037232	5.61791	3.49549	8.50866
19C	pH8	C	2	0.0214763	4.68148	4.1056	9.03382
19C	pH8	C	3	0.0192739	5.59597	3.69281	7.17519
19C	pH8	C	3	0.00792306	4.68775	5.36192	10.1386
23C	pH7.5	C	1	0.0171191	6.85802	3.35823	4.0836
23C	pH7.5	C	1	0.0132817	4.91707	2.46696	4.65014
23C	pH7.5	C	2	0.0218556	6.12656	5.61646	8.94182
23C	pH7.5	C	2	0.0128542	7.61536	5.48557	5.11731
23C	pH7.5	C	3	0.0103219	6.78227	4.21231	6.13474
23C	pH7.5	C	3	0.0116807	6.0208	2.37177	9.29887
19C	pH7.5	C	1	0.0106347	6.58857	5.37291	10.4297
19C	pH7.5	C	1	0.0340267	7.03044	6.64411	6.73307
19C	pH7.5	C	2	0.0313987	9.93435	5.14352	4.20684
19C	pH7.5	C	2	0.0261271	6.04587	4.16628	10.6953
19C	pH7.5	C	3	0.0261717	7.58287	3.77007	9.42019
19C	pH7.5	C	3	0.0114568	8.18348	3.88855	14.1703
23C	pH8	C	1	0.013365	9.25614	3.81063	7.65179
23C	pH8	C	1	0.0110899	4.9948	3.01992	15.3574
23C	pH8	C	2	0.0167222	7.93872	5.25355	8.69262
23C	pH8	C	2	0.0127045	9.59072	2.79832	10.4422
23C	pH8	C	3	0.028097	7.71461	3.9334	11.0485
23C	pH8	C	3	0.0240641	9.35923	2.91306	11.8918
23C	pH8	M	1	0.0273868	10.6074	4.77505	7.65179
23C	pH8	M	1	0.00770949	8.56503	4.42022	8.51849
23C	pH8	M	2	0.022501	9.49306	7.05812	6.08723
23C	pH8	M	2	0.0287707	9.20925	7.713	17.5645
19C	pH8	M	1	0.0136946	8.81992	5.88533	7.57178
19C	pH8	M	1	0.0496322	8.98809	5.84017	3.23672
19C	pH8	M	2	0.0265272	4.01268	7.50934	6.11683
19C	pH8	M	2	0.0238936	7.63734	7.10483	6.31082
19C	pH8	M	3	0.0245765	11.4231	6.85168	6.28764
19C	pH8	M	3	0.0155433	4.80159	10.0015	7.00698
23C	pH7.5	M	1	0.0163788	4.93581	6.41772	6.97275
23C	pH7.5	M	1	0.0206999	10.0135	9.13615	8.88911
23C	pH7.5	M	2	0.0484908	3.58965	4.61474	7.11468
23C	pH7.5	M	2	0.0165419	6.55539	5.15908	10.6336
23C	pH7.5	M	3	0.0380169	6.93631	5.1546	5.02413
23C	pH7.5	M	3	0.0345182	8.21591	7.39192	6.6285
19C	pH7.5	M	1	0.0272715	5.05795	7.5477	15.1834
19C	pH7.5	M	1	0.0164299	5.05795	5.12068	12.7404
19C	pH7.5	M	2	0.0218899	6.02416	3.20214	11.3993
19C	pH7.5	M	2	0.00645587	4.10477	4.7577	3.15763
19C	pH7.5	M	3	0.0113716	6.97513	4.66959	9.8242
19C	pH7.5	M	3	0.021956	5.81992	7.10574	15.6766

## Sheet: Hsp70
Temp	pH	Cont	tissue	Tank	HSP
19C	pH8	C	muscle	1	4.02316
19C	pH8	C	muscle	1	3.35408
19C	pH8	C	muscle	2	4.34148
19C	pH8	C	muscle	2	3.22725
19C	pH8	C	muscle	3	4.11652
19C	pH8	C	muscle	3	3.46863
19C	pH8	C	liver	1	4.88363
19C	pH8	C	liver	1	6.73896
19C	pH8	C	liver	2	7.19772
19C	pH8	C	liver	2	3.67431
19C	pH8	C	liver	3	4.48861
19C	pH8	C	liver	3	2.36291
19C	pH8	C	gills	1	2.79142
19C	pH8	C	gills	1	4.0045
19C	pH8	C	gills	2	3.9261
19C	pH8	C	gills	2	3.19025
19C	pH8	C	gills	3	3.73361
19C	pH8	C	gills	3	3.1766
23C	pH7.5	C	muscle	1	3.35539
23C	pH7.5	C	muscle	1	4.86462
23C	pH7.5	C	muscle	2	3.71132
23C	pH7.5	C	muscle	2	6.58101
23C	pH7.5	C	muscle	3	3.61335
23C	pH7.5	C	muscle	3	4.16192
23C	pH7.5	C	liver	1	4.48868
23C	pH7.5	C	liver	1	6.1135
23C	pH7.5	C	liver	2	4.39879
23C	pH7.5	C	liver	2	3.69797
23C	pH7.5	C	liver	3	4.41475
23C	pH7.5	C	liver	3	5.51069
23C	pH7.5	C	gills	1	2.26398
23C	pH7.5	C	gills	1	3.17924
23C	pH7.5	C	gills	2	3.17563
23C	pH7.5	C	gills	2	2.74261
23C	pH7.5	C	gills	3	2.05225
23C	pH7.5	C	gills	3	3.02328
19C	pH7.5	C	muscle	1	4.27572
19C	pH7.5	C	muscle	1	4.13974
19C	pH7.5	C	muscle	2	4.94534
19C	pH7.5	C	muscle	2	3.05852
19C	pH7.5	C	muscle	3	4.04299
19C	pH7.5	C	muscle	3	4.21272
19C	pH7.5	C	liver	1	3.90188
19C	pH7.5	C	liver	1	9.09339
19C	pH7.5	C	liver	2	7.95085
19C	pH7.5	C	liver	2	3.29059
19C	pH7.5	C	liver	3	4.09746
19C	pH7.5	C	liver	3	7.54732
19C	pH7.5	C	gills	1	1.99145
19C	pH7.5	C	gills	1	7.16286
19C	pH7.5	C	gills	2	3.50562
19C	pH7.5	C	gills	2	2.32295
19C	pH7.5	C	gills	3	2.86285
19C	pH7.5	C	gills	3	4.83911
23C	pH8	C	muscle	1	6.00878
23C	pH8	C	muscle	1	5.06509
23C	pH8	C	muscle	2	6.89683
23C	pH8	C	muscle	2	5.02831
23C	pH8	C	muscle	3	5.17143
23C	pH8	C	muscle	3	5.11381
23C	pH8	C	liver	1	2.28651
23C	pH8	C	liver	1	2.80687
23C	pH8	C	liver	2	4.72603
23C	pH8	C	liver	2	10.0855
23C	pH8	C	liver	3	4.91458
23C	pH8	C	liver	3	3.27916
23C	pH8	C	gills	1	2.61383
23C	pH8	C	gills	1	2.90699
23C	pH8	C	gills	2	2.62975
23C	pH8	C	gills	2	5.10219
23C	pH8	C	gills	3	2.73611
23C	pH8	C	gills	3	3.17604
23C	pH8	M	muscle	1	5.12381
23C	pH8	M	muscle	1	6.97935
23C	pH8	M	muscle	2	5.8096
23C	pH8	M	muscle	2	6.33478
23C	pH8	M	liver	3	8.38512
23C	pH8	M	liver	3	2.26489
23C	pH8	M	liver	1	8.10439
23C	pH8	M	liver	1	7.53094
23C	pH8	M	gills	2	3.29606
23C	pH8	M	gills	2	3.73748
23C	pH8	M	gills	3	3.68824
23C	pH8	M	gills	3	2.9736
19C	pH8	M	muscle	1	3.19889
19C	pH8	M	muscle	1	3.5007
19C	pH8	M	muscle	2	3.61056
19C	pH8	M	muscle	2	3.73247
19C	pH8	M	muscle	3	5.9278
19C	pH8	M	muscle	3	2.08765
19C	pH8	M	liver	1	6.71111
19C	pH8	M	liver	1	10.9037
19C	pH8	M	liver	2	9.38717
19C	pH8	M	liver	3	4.96111
19C	pH8	M	liver	3	5.64813
19C	pH8	M	gills	1	4.64719
19C	pH8	M	gills	1	3.52862
19C	pH8	M	gills	2	4.2894
19C	pH8	M	gills	2	3.3685
19C	pH8	M	gills	3	3.79508
19C	pH8	M	gills	3	3.73596
23C	pH7.5	M	muscle	1	5.38328
23C	pH7.5	M	muscle	1	3.13978
23C	pH7.5	M	muscle	2	4.77589
23C	pH7.5	M	muscle	2	4.2456
23C	pH7.5	M	muscle	3	2.98551
23C	pH7.5	M	muscle	3	5.70498
23C	pH7.5	M	liver	1	3.75923
23C	pH7.5	M	liver	1	3.24633
23C	pH7.5	M	liver	2	3.34771
23C	pH7.5	M	liver	2	4.37947
23C	pH7.5	M	liver	3	4.12838
23C	pH7.5	M	liver	3	3.81912
23C	pH7.5	M	gills	1	4.10964
23C	pH7.5	M	gills	1	3.41387
23C	pH7.5	M	gills	2	3.49572
23C	pH7.5	M	gills	2	6.01856
23C	pH7.5	M	gills	3	3.0441
23C	pH7.5	M	gills	3	3.53383
19C	pH7.5	M	muscle	1	6.13978
19C	pH7.5	M	muscle	1	3.59434
19C	pH7.5	M	muscle	2	4.83897
19C	pH7.5	M	muscle	2	3.81853
19C	pH7.5	M	muscle	3	6.13978
19C	pH7.5	M	muscle	3	6.84141
19C	pH7.5	M	liver	1	2.93617
19C	pH7.5	M	liver	1	6.43438
19C	pH7.5	M	liver	2	4.23507
19C	pH7.5	M	liver	2	3.03963
19C	pH7.5	M	liver	3	7.28428
19C	pH7.5	M	liver	3	2.12013
19C	pH7.5	M	gills	1	6.61989
19C	pH7.5	M	gills	1	3.27174
19C	pH7.5	M	gills	2	3.67177
19C	pH7.5	M	gills	2	3.52474
19C	pH7.5	M	gills	3	3.7966
19C	pH7.5	M	gills	3	5.17675

## Sheet: Alkalinity
MeHg	pH	Temp	Salinity	T (°C)	TA (mmol/kgSW)	pH (total Scale)	CT (mmol/kgSW)	pCO2 in (µatm)	Ω Ar
Non- contaminated	8	19 °C	35	19.2	2214.3	8.021	1977.02	401.169	2.61372
			36	19.4	2226.6	8.034	1973.69	386.148	2.74336
			34	18.7	2197.1	8.015	1974.06	407.998	2.48748
			35	19.1	2185.9	8.046	1938.77	369.557	2.69219
		23 °C	35	23.4	2188.5	8.012	1924.98	404.347	2.92514
			36	23.1	2203.7	8.029	1925.16	385.18	3.04046
			34	23.2	2193.8	8.003	1942.98	419.572	2.83181
			35	23.1	2216.9	8.015	1951.84	406.602	2.95133
	7.5	19 °C	35	19.2	2209.4	7.533	2163.02	1411.76	0.972056
			36	19.2	2185.2	7.521	2139.79	1431.34	0.951185
			35	19.1	2194	7.509	2155.61	1486.5	0.913247
			35	19.4	2231.6	7.516	2189.59	1488.23	0.954145
		23 °C	35	23	2204.4	7.512	2148.72	1503.34	1.07248
			36	23.4	2212.1	7.531	2145.05	1433.6	1.15408
			34	23.3	2241.2	7.523	2183.49	1497.38	1.11201
			35	22.9	2200.7	7.514	2144.84	1492.87	1.07112
Contaminated	8	19 °C	35	19.3	2203.5	8.003	1975.24	419.241	2.52291
			36	19.4	2216.4	8.016	1973.64	403.846	2.64085
			35	19.1	2207.1	8.019	1972.12	402.035	2.58635
			35	19.2	2222.8	8.007	1991.95	418.48	2.55626
		23 °C	35	22.9	2196.1	7.998	1943.38	422.229	2.81427
			36	23.2	2210.9	8.014	1939.23	403.026	2.97933
			34	23.4	2216.3	8.009	1958.96	416.945	2.91323
			35	23.1	2217.1	8.001	1959.54	422.785	2.87718
	7.5	19 °C	35	19.3	2201.3	7.522	2158.01	1445.69	0.949539
			36	19.2	2206.6	7.501	2167.35	1518.5	0.920318
			34	19.2	2184.6	7.509	2148.77	1488.19	0.898075
			35	19	2221.7	7.513	2182.35	1490.21	0.929322
		23 °C	35	23.4	2234.9	7.493	2183.42	1599.96	1.06048
			36	23.5	2237.1	7.514	2174.98	1513.21	1.13036
			34	23.1	2219.3	7.521	2163.35	1488.94	1.08796
			35	23.2	2215.4	7.509	2159.73	1523.21	1.07925
